# Supplementary material
Source: Springer Nature journal article supplement (https://www.springermedizin.de/resource/supplementary/12865_2004_64_MOESM5_ESM.pdf/9428478)

### A (Naïve B)

Relative antibody secretion levels

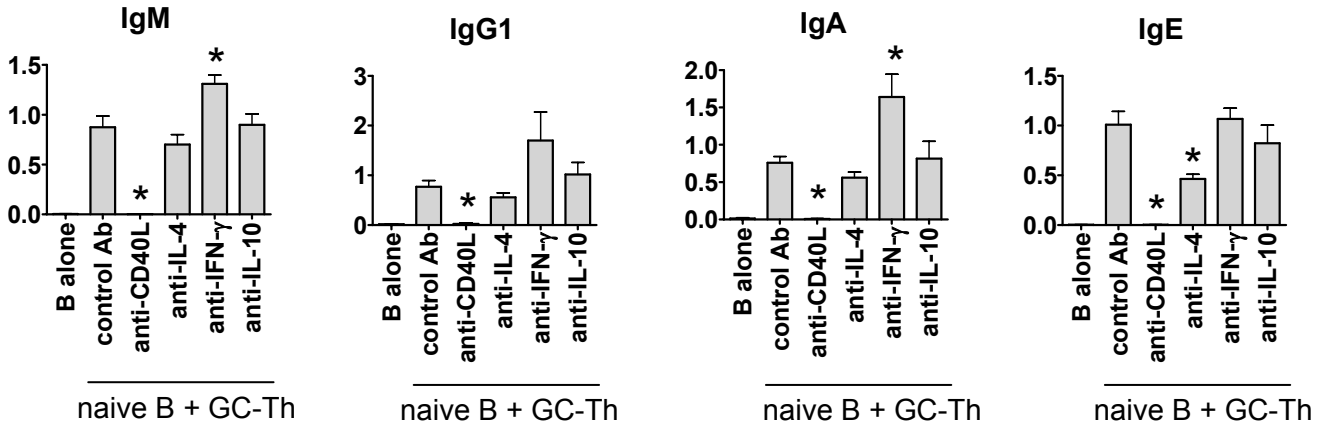

### B (GC-B cells)

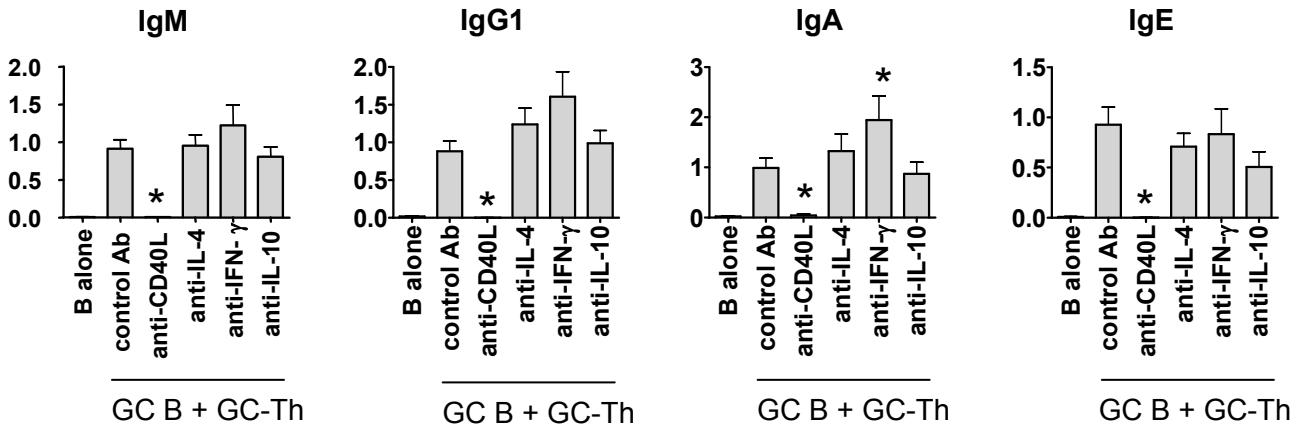

### C (Naïve B)

Relative antibody secretion levels

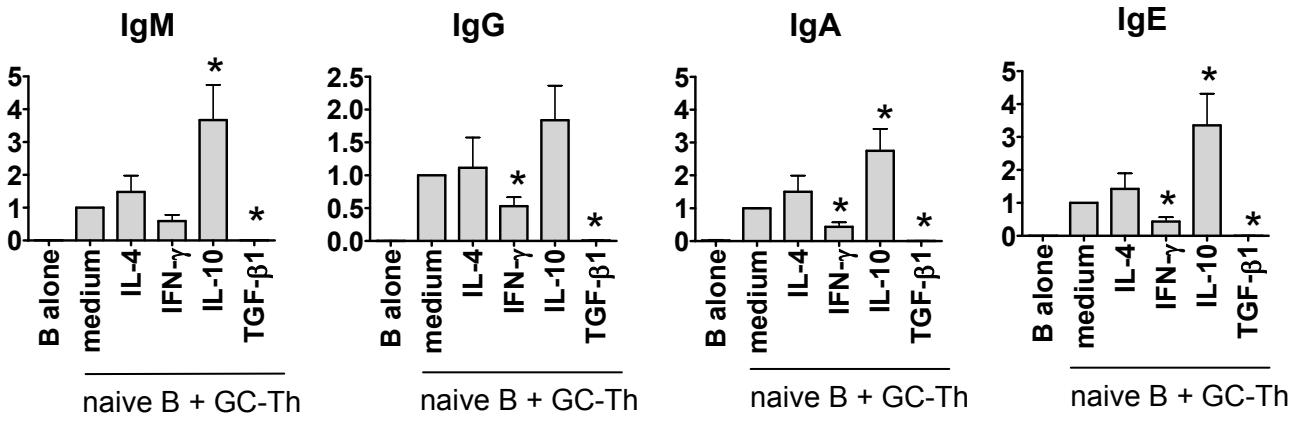

### D (GC-B cells)

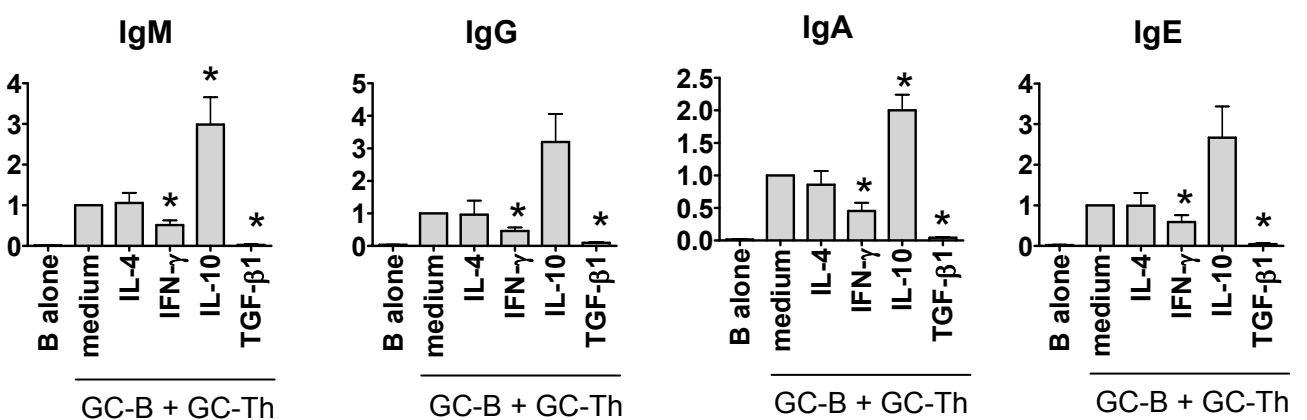

Supplement: MOESM5 [file 9428478]
